# Supplementary material for: Report From the 1st International NOD Mouse T-Cell Workshop and the Follow-Up Mini-Workshop
Source: Oxford University Press journal article supplement (doi:10.2337/diabetes.50.11.2459), 2001-11-01
Supplement: diabetes50112459-sup-online_appendix_no_1_d01-297.doc [file diabetes50112459-sup-online_appendix_no_1_d01-297.doc]

# Supplementary information for the article by Kaufman et al., *Diabetes* 50:2459–2463, November 2001

**GAD Expression and Purification Protocol**

**(Sarvetnick’s Lab)**

## **Cell Culture**

Order a frozen vial of SF 9 or SF21 insect cells (B825-01 or B821-01; Invitrogen). The cells come with a very comprehensive instruction manual from the manufacturer. They are adherent cells and need to be scraped off or hit briskly for harvesting. You can expand them and store cell stocks in liquid nitrogen, but this needs to be done with as little passaging as possible. The more you passage these cells, and the longer you grow them, the less productive they become.

SF9/21 cells are grown in TNM-FH media or Grace’s insect media (B823-01; Invitrogen) at 27C or room temperature. A room temperature regulated incubator is recommended for best results. These cells usually double every day if they are healthy, and they must be grown at a confluency between 25 and 95% for best results. Refer to the instruction manual for exact instructions.

One GAD preparation uses ~12 150- to 162-cm flasks. This can take several weeks when starting from 1 frozen vial, and cells must be in log phase for best results and yield.

# Viral Infection

The baculovirus is engineered to express GAD65 linked to a 6-histidine tag. High-titer baculovirus stocks are used for infection. Plate out 12 162-cm flasks at 8.3  105 cells/ml in a total volume of 30 ml TNM-FH. Let cells attach overnight.

Remove the media and infect them with 10 ml GAD 65 high-titer stock per flask. Incubate 1 h at room temperature on a rocker, and then add 20 ml TNM-FH per flask. Incubate undisturbed for 4 days at room temperature.

# Harvest Protein

Harvest the cell suspension in the flask by hitting it lightly to get all cells off the surface. Spin for 10 min at 1,500 rpm. Save the supernatant for analysis. Wash the pellet once with phosphate-buffered saline (PBS). Lyse cells with 40 ml 6 mol/l Gu-HCl, pH 8.0, and then homogenize them to shear DNA. Your lysate is now ready for purification.

# Protein Purification

The cell lysate is purified over a nickel resin, to which the histidine-tagged GAD will bind (Ni-NTA agarose; Qiagen). All purification is performed batchwise in a 50-ml tube.

Wash the resin with 6 mol/l Gu-HCl buffer 2–3 times before applying the lysate. If starting from a new bottle of resin, use 8–20 ml of 50% slurry. The resin can be reused ~3–4 times with the same protein, if necessary. Once the resin is equilibrated in Gu-HCl, the lysate can be added. Incubate overnight on a rocker at 4C.

Collect the supernatant by spinning the resin at 2,000 rpm at 4C. Wash the resin with 30 ml of 6 mol/l Gu-HCl, and save the wash for analysis. Wash the resin three times with 20 ml of 8 mol/l urea, pH 8.0, and then combine the washes and save them for analysis. Repeat this step with 20 ml of 8 mol/l urea, pH 6.6. Because protein is eluted at pH 4.5, wash the resin eight times with 5 ml of 8 mol/l urea, pH 4.5. Combine each of two consecutive washes, for a total of four fractions. These fractions contain the GAD.

Dialyze the four pooled fractions against PBS immediately. Change the PBS twice within the first 30 min. Then, dialyze overnight and throughout the next day with 4–5 PBS changes (at 4C). The GAD protein will precipitate in the dialysis bag.

Collect the precipitate and solution from the bag and spin at 2,000 rpm at 4C for 10 min. Resuspend the precipitated protein in ~0.5–1 ml sterile PBS under the hood if GAD is being used for sterile tissue culture. Much of the precipitated GAD will not dissolve, but try to make a homogenous solution. Take out 10–20 µl to quantitate the protein as described below. Aliquot the sample, and store it at –20C.

**Analysis**

Check all fractions from the purification on an 8% SDS-PAGE gel. Flow-through and washes may need to be diluted 1:10, after which 5 l of that may be run. All samples should be diluted 1:1 with sample loading buffer. Stain with coomassie, destain with 10% MeOH and 10% acetic acid, and dry.

**Protein quantification**

Take 10–20 µl of the resuspended sample and dilute it 1:3 with PBS, then add DMSO to 1:300 dilution. Sonicate the sample and incubate it overnight in a 56C water bath. Sonicate again before assaying for protein concentration.

A Pierce Micro BCA protein assay kit was used to quantify the GAD concentration. It comes with bovine serum albumin solutions to make a standard curve to calculate concentrations. A complete comprehensive instruction manual is provided with the Pierce BCA kit.

**Testing the GAD**

A T-cell proliferation test was performed to test the four GAD fractions and obtain a proliferation index as a basis for purity (see accompanying T-cell proliferation protocol at www.diabetes.org/diabetes/appendix/asp). Splenocytes from three control wild-type mice (e.g., BALB/c or C57BL6) as well as three NOD females 7–12 weeks of age were tested individually in triplicate wells. Analysis of wild-type splenocyte responses is necessary to control for nonspecific immunostimulatory contaminants in the preparations. ConA is the positive control, no antigen is a negative control, and each GAD fraction is used at 5, 10, and 20 g/ml (well concentration) to determine the best concentration to use.
