# Supplementary material for: Report From the 1st International NOD Mouse T-Cell Workshop and the Follow-Up Mini-Workshop
Source: Oxford University Press journal article supplement (doi:10.2337/diabetes.50.11.2459), 2001-11-01
Supplement: diabetes50112459-sup-online_appendix_no_2_d01-297.doc [file diabetes50112459-sup-online_appendix_no_2_d01-297.doc]

# Supplementary information for the article by Kaufman et al., *Diabetes* 50:2459–2463, November 2001

# T-Cell Proliferation Protocol

1. Use three 8- to 10-week-old female NOD mice and three 8- to 10-week-old female control mice (such as BALB/c or C57B6).
2. Dissect spleens from individual mice and place them in Dulbecco’s modified Eagle’s medium (DMEM; with 2% fetal calf serum, penicillin/streptomycin, and 2 mm glutamine) at room temperature.
3. Over a petri dish, individually grind each spleen gently between the frosted sides of 2 autoclaved glass slides (25  75 mm, frosted on one side, VWR #48312-002) to get a single-cell suspension. Transfer the suspension to a 15-ml conical tube. Wait 2­­–3 min, and transfer the suspension into a new tube, leaving the debris behind. Spin at 1,000 rpm in a clinical centrifuge for 10 min. Pour off the supernatant. Very gently resuspend the pellet into the remaining drop of media by flicking the bottom of the tube. Add 10 ml DMEM (with 2% FCS, penicillin/streptomycin, and 2 mm glutamine), mix by gently inverting the tube, and spin again as above. Resuspend the pellet as described above and repeat the washing procedure. (Perform all manipulations at room temperature.)
4. After gently resuspending the cells in 10 ml DMEM and 2% FCS for a second time, take out 0.5 ml of the suspension and add it to 4.5 ml of 0.84% NH4Cl 2 and 2 µmol/l EDTA (pH 7.4) to lyse the red blood cells. Count the cells, and calculate the number of mononuclear cells in the suspension. Spin the suspension as above, but resuspend it into HL-1 media (BioWhittacre) containing 2 mmol/l glutamine and penicillin/streptomycin. Spin the cells again, and this time resuspend them in a volume of HL-1 that will give a final concentration of 5  106 cells/ml. (Do not lyse the red blood cells.)
5. To a 96-well flat bottom plate (e.g., Costar 3595 or Falcon 3072), add 100 µl of HL-1 (with 2 mmol/l glutamine) containing 14 µmol/l peptide (in triplicate). Note: each peptide stock we sent was 700 µmol/l, so you will add 2 µl of each stock per 100 µl media. Filter the media and peptide mixture using a 0.2-µmol/l syringe filtration unit before adding it to the wells.
6. As controls, we used another set of 3 wells with media alone and another set of 3 wells with media plus 0.5 µg/ml anti-CD3.
7. Add 100 l NOD (or control) mononuclear cell suspension to yield 5  105 cells/well in 200 µl of HL-1 media and a final concentration of 7 µmol/l peptide.
8. Incubate the plate in a 37C incubator (7% CO2) for 4 days.
9. During the last 16 h of incubation, add 1 Ci 3H thymidine in a total volume of 50 µl HL-1 media to every well.
10. Harvest, add scintillation fluid, and count.
